1 A large close relative of *C. elegans* is slow-developing but not long-lived

2 Gavin C. Woodruff<sup>1\*</sup>, Erik Johnson<sup>1</sup>, and Patrick C. Phillips<sup>1</sup>

3 <sup>1</sup>University of Oregon, Department of Biology, Institute of Ecology and Evolution, Eugene,  
4 Oregon

5 \*Correspondence: [gavincw@uoregon.edu](mailto:gavincw@uoregon.edu)

6

7

8

9

10

11

12

13

14

15

16

17

18

19

20

21

22

23

24

25

26

27 **Abstract**

28 Background:

29 Variation in body size is thought to be a major driver of a wide variety of ecological and  
30 evolutionary patterns, including changes in development, reproduction, and longevity.  
31 *Caenorhabditis inopinata* is a recently-discovered fig-associated nematode that is unusually  
32 large relative to other members of the genus, including the closely related model system *C.*  
33 *elegans*. Here we test whether the dramatic increase in body size has led to correlated changes in  
34 key life history and developmental parameters within this species.

35 Results:

36 Using four developmental milestones, *C. inopinata* was found to have a slower rate of  
37 development than *C. elegans* across a range of temperatures. Despite this, *C. inopinata* did not  
38 reveal any differences in adult lifespan from *C. elegans* after accounting for differences in  
39 developmental timing and reproductive mode. *C. inopinata* fecundity was generally lower than  
40 that of *C. elegans*, but fitness improved under continuous-mating, consistent with sperm-  
41 limitation under gonochoristic (male/female) reproduction. *C. inopinata* also revealed greater  
42 fecundity and viability at higher temperatures.

43 Conclusion:

44 Consistent with observations in other ectotherms, slower growth in *C. inopinata* indicates a  
45 potential trade-off between body size and developmental timing, whereas its unchanged lifespan  
46 suggests that longevity is largely uncoupled from its increase in body size. Additionally,  
47 temperature-dependent patterns of fitness in *C. inopinata* are consistent with its geographic  
48 origins in subtropical Okinawa. Overall, these results underscore the extent to which changes in  
49 ecological context and body size can shape life history traits.

50 **Keywords**

51 Body size; life history; *C. elegans*; lifespan; heterochrony

52

53

54

55

56

57

58

59

## 60 **Background**

61 Trade-offs dominate life history evolution. Organisms have access to limited energy resources,  
62 and these must be allocated in a balance between self-maintenance and reproductive output. In  
63 keeping with the expectation that different distributions of life history traits (such as age of  
64 maturity, reproductive duration, and age-specific fecundity, among others) should be sensitive to  
65 different distributions of selective pressures on those traits, a huge diversity of patterns among  
66 life history traits has emerged across the broad scope of animal diversity [1-5]. As a  
67 consequence, many organisms exhibit well-documented correlations among traits such as  
68 fecundity and survival [6-8], fecundity and developmental rate [1, 9-11], and reproductive  
69 quantity and quality [12, 13].

70 Body size is a particularly potent component of life history syndromes. Body size is usually  
71 correlated with a multitude of fitness-related traits including developmental rate, offspring  
72 number, offspring size, gamete size, and lifespan [14-17]. Body size is also known to covary  
73 with physiological traits, such as metabolic rate, thought to underlie trade-offs among life history  
74 traits [15, 17]. These factors in turn generate allometric relationships that appear to explain scale-  
75 based trends for a wide variety of traits across many orders of magnitude [15]. Indeed, body size  
76 appears to be a central component of broad macroevolutionary trends among lineages over  
77 geological timescales [18]. But which is cause and which is effect? To what extent does change  
78 in body size due to selection on body size per se lead to collected changes in such a wide array of  
79 life history traits and to what extent does body size change because of selection acting directly on  
80 these traits?

81 Life history theory suggests that selection for increased body size can be balanced against the  
82 benefits of faster reproduction and the costs of lower offspring viability and lower initial  
83 fecundity [1], weighed against a backdrop of differential allocation of physiological and  
84 metabolic resources to each of these processes and to growth itself [17, 19]. At the same time,  
85 selection on body size itself must be mediated via environmental factors such as resource  
86 availability and/or predation [20]. Although these various causes are not mutually exclusive and  
87 likely overlap, the proximate and ultimate causes of changes in body size change—particularly  
88 the relationship between these two—remain largely unresolved.

89 The nematode *Caenorhabditis elegans* has for decades been an important model for genetics,  
90 development, and biology in general [21]. However, the degree and extent of trade-offs between  
91 body size and other life history traits in systems like *C. elegans* remain largely unknown and/or  
92 have generated somewhat ambiguous or contradictory results [22-30]. Further, because nearly all  
93 known members of this genus share a common natural ecological niche of rotting plant material  
94 [31], it has not been possible to use a comparative approach to investigate how change in  
95 ecological circumstances might drive changes in the relationship between body size and life  
96 history [19]. Here, we address this question by taking advantage of a highly phenotypically and  
97 ecologically divergent close relative of *C. elegans*: the recently discovered fig-associated  
98 nematode *C. inopinata*.

99 *C. inopinata* (formerly known as *C. sp. 34*) is remarkable in that it displays tremendous  
100 ecological and phenotypic differences compared to its close relatives [32, 33]. Compared to other  
101 *Caenorhabditis*, *C. inopinata* is huge: it can grow to be nearly twice as long as other members in

102 the genus [32, 33]. *C. inopinata* also develops nearly twice as slowly, has sperm three times the  
103 size, and embryos 20% longer than *C. elegans* [33]. Furthermore, in contrast to the rotting-plant  
104 material ecological niche of *C. elegans* and other *Caenorhabditis* species [34], it thrives in the  
105 fresh, intact Okinawan figs of *Ficus septica* [32, 33, 35]. *C. inopinata* thus appears to have  
106 experienced a radically different selective environment that has led to its highly divergent suite  
107 of life history traits. And, as *C. inopinata* is much larger in size and develops much more slowly  
108 than its close relatives, it can therefore be used as a natural system to test the predictions of life  
109 history theory using a comparative approach. Here, we do just this by describing the  
110 developmental timing, lifespan, fecundity, and viability of *C. inopinata* and *C. elegans* at  
111 multiple temperatures.

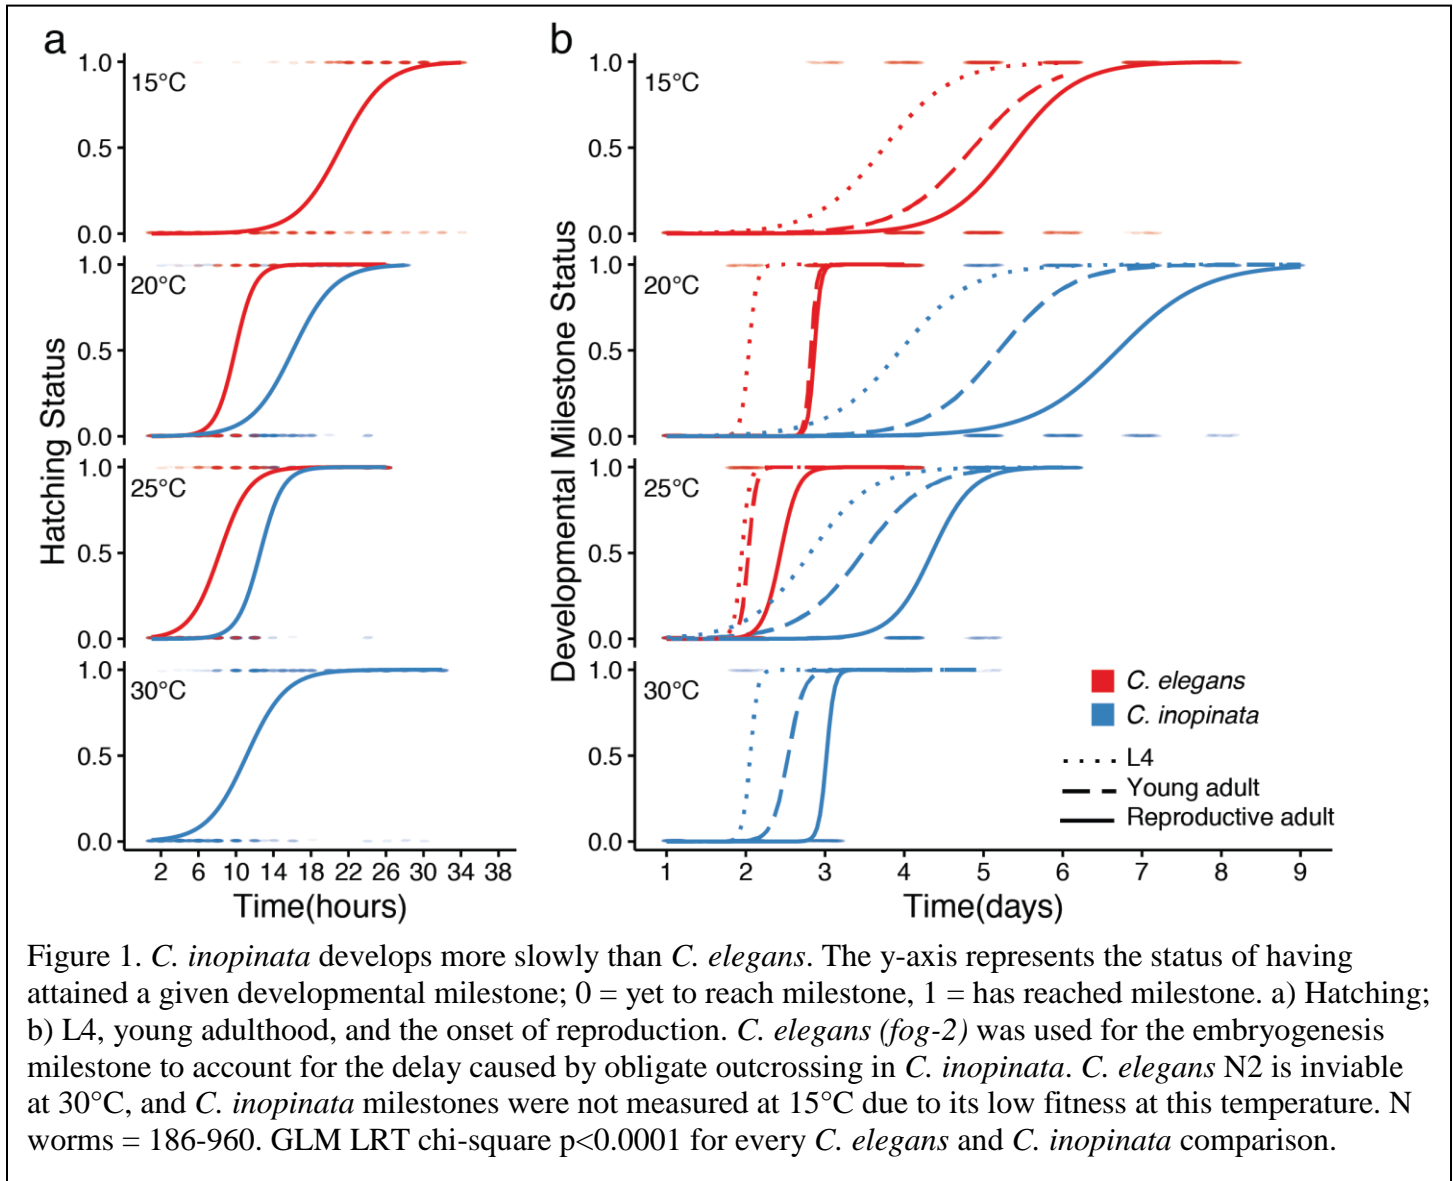

## 112 Results

113 *C. inopinata* develops more slowly yet does not differ from *C. elegans* in lifespan and  
114 reproductive duration

115 Initial measures of developmental rate revealed that *C. inopinata* develops about twice as slowly  
116 as *C. elegans* [33]. To provide a more complete picture of the timing of development in this  
117 species, the occurrence of four different developmental milestones (time of hatching, onset of the  
118 L4 stage, onset of adulthood, and the onset of reproduction) was ascertained at four different  
119 temperatures (15°C, 20°C, 25°C, and 30°C) among synchronized populations of *C. elegans* and  
120 *C. inopinata*. Unsurprisingly, all species grew faster as the temperature increased (Figure 1;  
121 Table S1). Yet in conditions where both species grew reliably, *C. inopinata* was slower to reach  
122 all developmental milestones than *C. elegans* (Figure 1; Table S1). Indeed, at the typical rearing  
123 temperature of *C. elegans* (20°C), the median time of reproductive onset was 2.7 days in *C.*

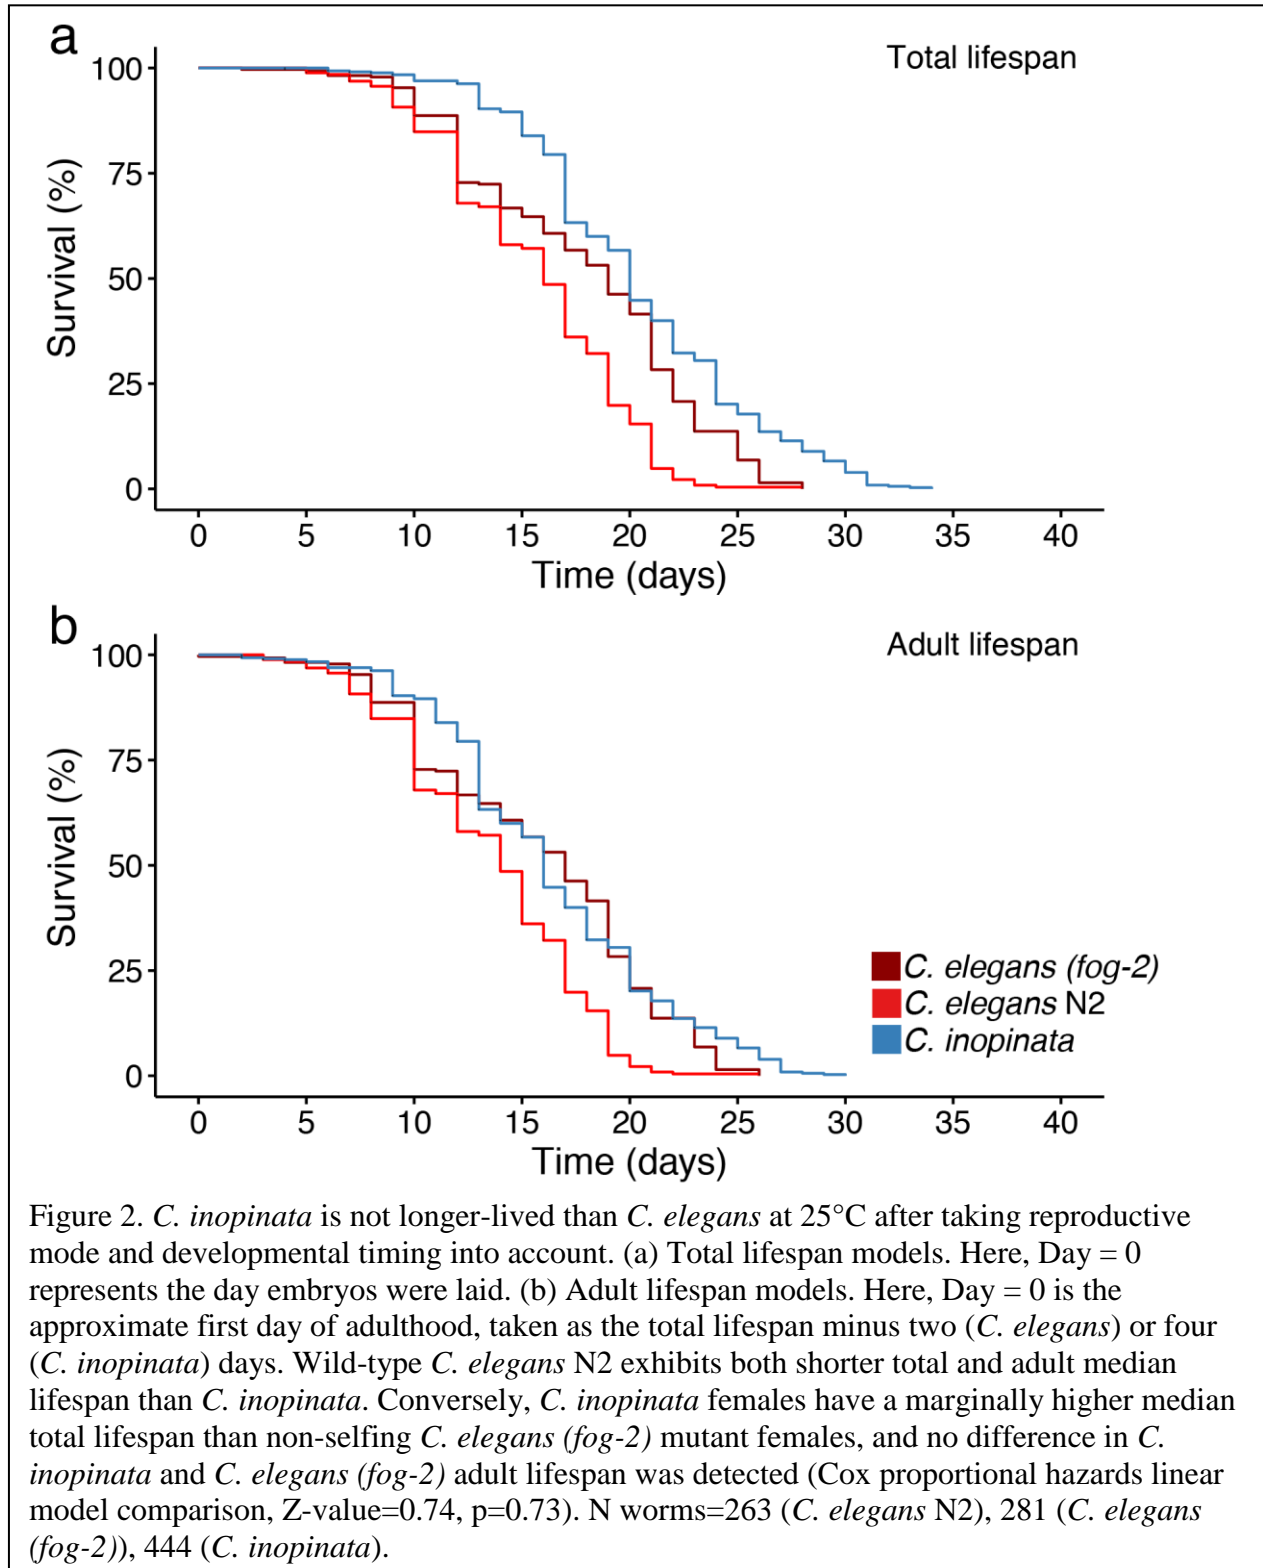

124 *elegans*, whereas it was 6.7 days in *C. inopinata* (GLM LRT chi-square=4861.4, df=2,  
125 p<0.0001). To reach a developmental rate that approaches that of *C. elegans* at 20°C, *C.*  
126 *inopinata* must be reared at a temperature that is ten degrees higher (Figure 1b; Table S1) where

127 it exhibits reduced fecundity (Figure 4a) and where *C. elegans* N2 is inviable (Figure 5). Overall,  
128 then, *C. inopinata* has slower relative growth regardless of temperature.

129 As slow developing, large animals tend to be longer-lived [1], we were curious if *C. inopinata*  
130 also exhibits prolonged longevity. To address this, we applied previously established methods of  
131 lifespan measurement in nematodes [36] to *C. inopinata*. As a point of comparison, we also  
132 measured *C. elegans* N2 and *C. elegans (fog-2)* lifespans. As lifespan often trades-off with  
133 reproductive output [37, 38], we used virgin *C. elegans (fog-2)* pseudo-females (which do not  
134 generate self-sperm and are self-sterile as a consequence [39]) to control for differences in  
135 reproductive mode. *C. inopinata* females were longer-lived than wild-type *C. elegans*  
136 hermaphrodites at 25°C, with a median total lifespan that was four days higher (20 and 16,  
137 respectively; Cox proportional hazards linear model comparison, Z-value=4.99, p<0.0001 Figure  
138 2a; Figure S1). However, *C. inopinata* females were only marginally longer lived than *C.*  
139 *elegans (fog-2)* pseudo-females (19 days, Cox proportional hazards linear model comparison, Z-  
140 value=2.29, p=0.053). Furthermore, no differences in adult lifespan (which takes into account the  
141 differences in developmental timing between *C. elegans* and *C. inopinata*) were detected  
142 between *C. inopinata* females (median adult lifespan of 16 days) and *C. elegans (fog-2)* pseudo-  
143 females (median adult lifespan of 17 days; Cox proportional hazards linear model comparison,  
144 Z-value=0.74, p=0.73; Figure 2b; Figure S2). Thus, despite its large size and slow development,  
145 *C. inopinata* adults are not longer-lived than *C. elegans* after accounting for differences in  
146 reproductive mode and developmental timing.

147 The duration of reproduction is also expected to trade-off with growth rate and body size [1, 2],  
148 with large, slow-developing animals tending to have longer reproductive periods [9-11]. To see  
149 if this also holds for *C. inopinata*, daily measures of fecundity were made with individual *C.*  
150 *elegans (fog-2)* pseudo-females and *C. inopinata* females under conditions of continuous mating  
151 throughout their lifetimes (Figure 3). Although one individual *C. inopinata* female had a  
152 reproductive duration of twelve days, for the most part, both species lay almost all of their  
153 embryos in the first four days of adulthood (Figure 3b). Indeed, under continuous mating  
154 conditions at 25°C, no differences in brood fraction per day could be detected between *C.*  
155 *inopinata* and *C. elegans* with the exception of day eight of adulthood (Wilcoxon rank sum test,  
156 W=528, p=0.041). Thus, like lifespan, duration of reproduction is not extended in *C. inopinata*.

### 157 *C. inopinata* is sperm-limited and reveals higher fitness at higher temperatures

158 Brood size also tends to covary with both body size and developmental rate [1, 2], and so  
159 fecundity was measured at four different temperatures in *C. inopinata* and *C. elegans (fog-2)* to  
160 address if similar patterns hold in this group (Figure 4). In conditions in which females were  
161 mated with males for just one night, *C. inopinata* generally displayed far smaller brood sizes  
162 than *C. elegans (fog-2)*, with the exception that *C. elegans (fog-2)* is infertile at 30°C (Figure 4a).  
163 However, as the male/female species *C. remanei* is known to generate more progeny when  
164 constantly exposed to males [40, 41], we suspected that *C. inopinata* might also be sperm-  
165 limited. Indeed, under continuous mating conditions, there is no detectable difference in brood  
166 size between *C. inopinata* and *C. elegans (fog-2)* (median brood size of 58 and 76, respectively;  
167 Wilcoxon rank sum test, W=484 p=0.62; Figure 4b). However, male mating performance tends  
168 to degrade in selfing species [42], so we also compared the fraction of successful crosses  
169 between *C. elegans* and *C. inopinata* (Figure S3). In continuous mating conditions, the fraction



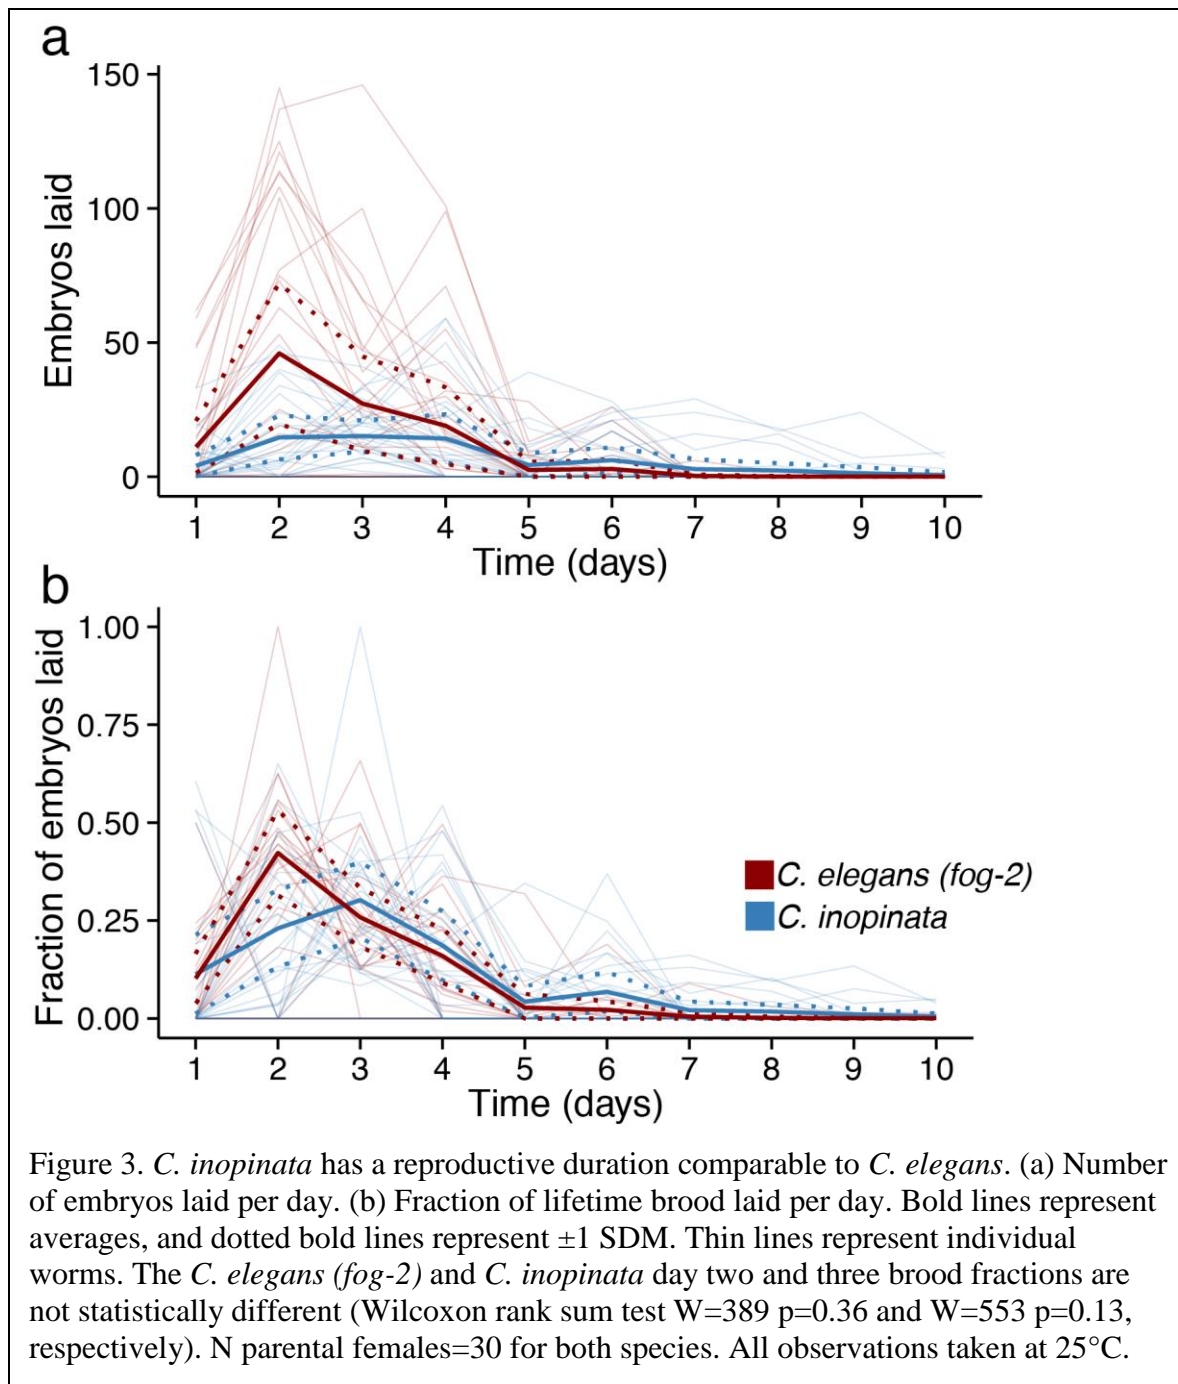

170 of failed crosses was higher in *C. elegans* (0.33,  $N=30$  crosses) than in *C. inopinata* (0.17,  $N=30$   
171 crosses), although this difference was not statistically significant (Fisher's Exact Test odds  
172 ratio=2.46,  $p=0.23$ ). After removing animals that failed to produce progeny, *C. elegans (fog-2)*  
173 yielded a median brood size that is over twice as large as that of *C. inopinata* in continuous  
174 mating conditions (145 and 65, respectively; Wilcoxon rank sum test,  $W=359$ ,  $p=0.013$ ; Figure  
175 S4). Thus *C. inopinata* requires constant access to mates in order to maximize its reproductive  
176 output, consistent with its gonochoristic mode of reproduction.



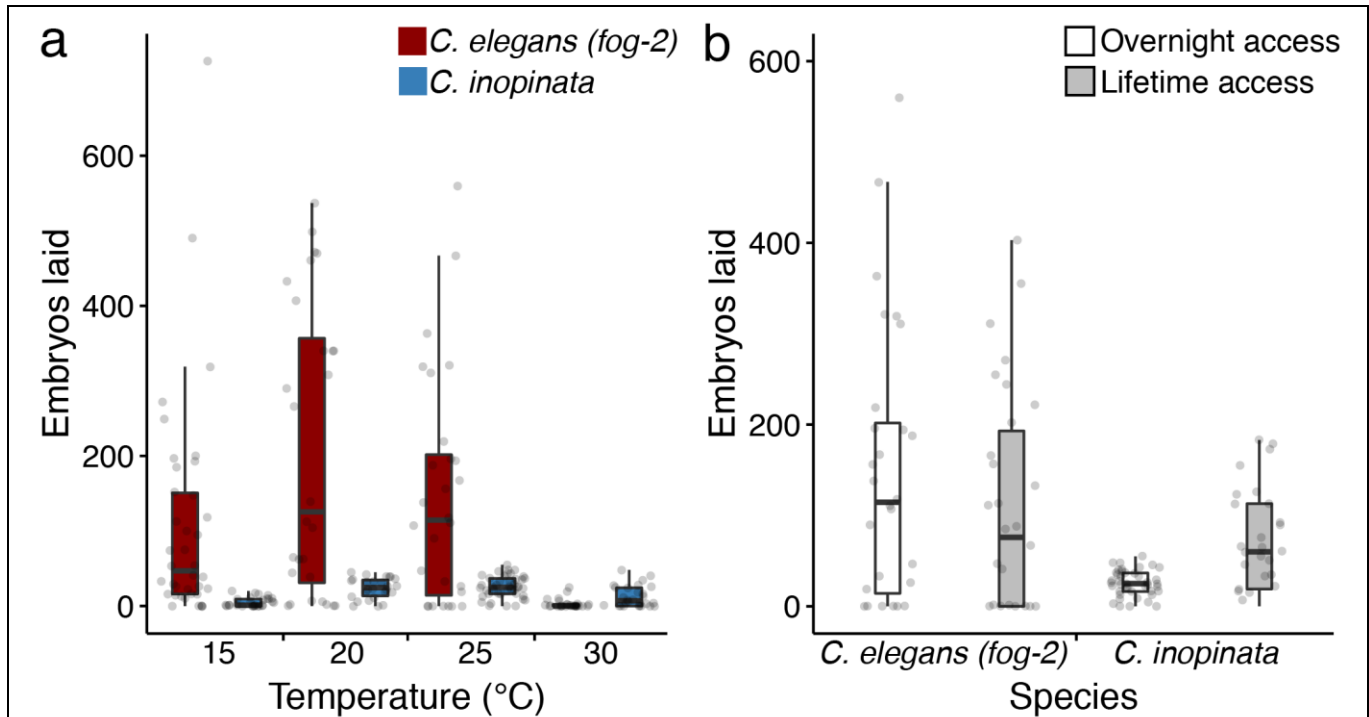

Figure 4. *C. inopinata* is sperm-limited. (a) Number of embryos laid in single overnight mating conditions at various temperatures. (b) Number of embryos laid in continuous mating or single overnight mating conditions at 25°C. The “one overnight mating” data in panel (b) is the same from those at 25°C in panel (a). *C. inopinata* has smaller broods than *C. elegans (fog-2)* in every condition except 30°C (Wilcoxon rank sum test  $p < 0.0001$  for 15 and 20°C;  $W = 349$ ,  $p = 0.004$  for 25°C;  $W = 575$ ,  $p = 0.002$  for 30°C). However, there is no detectable difference in *C. elegans (fog-2)* and *C. inopinata* brood sizes under continuous mating conditions (Wilcoxon rank sum test,  $W = 484$ ,  $p = 0.62$ ). N parental females = 26-42.

177 When examining the relationship between developmental rate and fecundity, the intrinsic rate of  
178 increase ( $r$ ) is likely a better measure of fitness than total fecundity ( $R_0$ ) [1, 43]. Under this  
179 approach, fitness is a function of age-specific fecundity and viability, and the age of first  
180 reproduction can highly influence the population growth rate [1]. So although *C. inopinata* and  
181 *C. elegans* have comparable brood sizes under continuous mating conditions, they likely differ in  
182 fitness because of their different developmental rates. Indeed, despite their comparable brood  
183 sizes, *C. elegans* has a rate of increase ( $r = 1.54$ , 95% CI = 1.26-1.72) that is over twice as high as  
184 *C. inopinata* ( $r = 0.66$ , 95% CI = 0.54-0.74). This difference in fitness is even greater in mating  
185 conditions with just overnight access to males (*C. elegans*  $r = 2.09$ , 95% CI = 1.88-2.24; *C.*  
186 *inopinata*  $r = 0.63$ , 95% CI = 0.55-0.69). Thus continuous access to males is not sufficient to  
187 overcome the detriment to fitness due to slow development in *C. inopinata*.

188 In keeping with the other life-history measures, *C. elegans* was more viable at lower  
189 temperatures and *C. inopinata* more viable at higher temperatures during early development  
190 (Figure 5). Overall, however, *C. inopinata* displayed consistently lower embryo-to-adult viability  
191 than *C. elegans* at 15°C, 20°C, and 25°C (Wilcoxon rank sum test  $p < 0.001$  in all comparisons;  
192 Figure 5). No detectable differences in *C. inopinata* viability were found between 20°C, 25°C,  
193 and 30°C (median viability of 0.84, 0.79, and 0.88, respectively; Wilcoxon rank sum test  $W = 50$

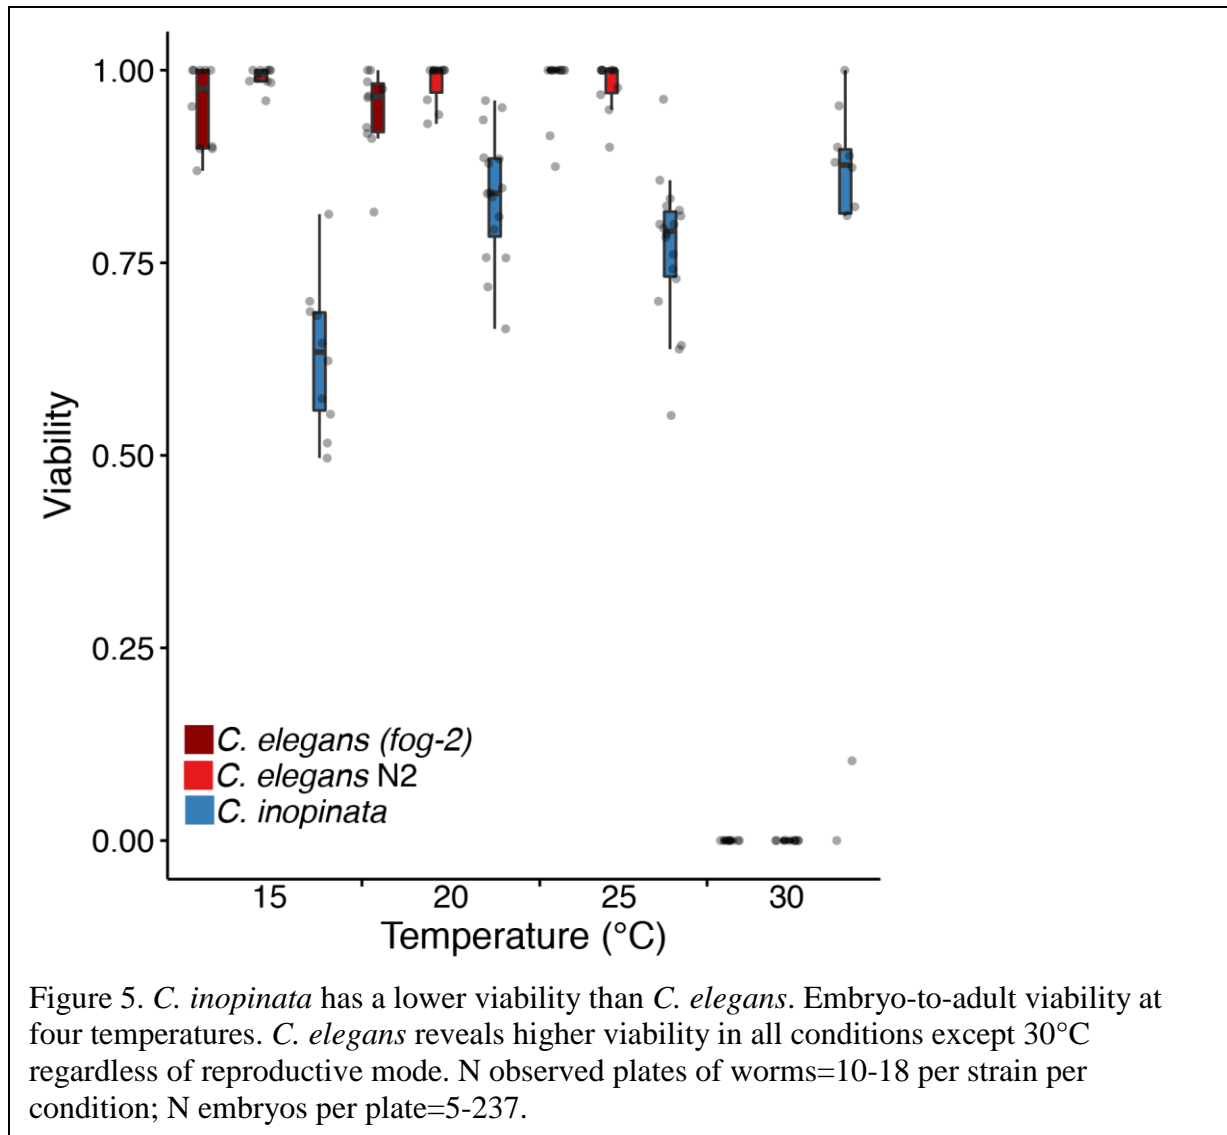

194  $p=0.060$ ,  $W=70$   $p=0.62$ ; Figure 5), but *C. inopinata* is less viable at 15°C (median viability of  
195 0.63; Wilcoxon rank sum test  $p \leq 0.030$  for all comparisons). As *C. inopinata* fecundity is also  
196 higher at warmer temperatures (Figure 4a), these temperature-specific fitness patterns are  
197 consistent with its subtropical natural context of fresh Okinawan *Ficus septica* figs.

## 198 Discussion

199 Possibly because it is both obvious and easy to measure, body size variation has been studied  
200 extensively for centuries. The range in body size across the tree of life is so immense as to  
201 demand explanation (21 orders of magnitude [16, 44]), and this incredible diversity has spawned  
202 a vast and rich literature attempting to comprehend its origins and maintenance. One major  
203 conclusion from this research program is that body size is correlated with nearly every trait, such  
204 that long-established relationships between body size and growth, reproduction, and lifespan  
205 underscore a prominent role for body size in the evolution of life histories [14, 15, 44]. Here, we  
206 found that an exceptionally large close relative of *C. elegans* exhibits slow growth and low  
207 fecundity across a range of temperatures yet is not long lived. Together with the extensive *C.*

208 *elegans* literature and the foundations of life history theory, these observations can inform our  
209 understanding of the causes and consequences of large-scale changes in body size.

### 210 *Developmental timing*

211 It makes intuitive sense that larger organisms should develop more slowly. Being more massive,  
212 presumably more cell divisions and/or biosynthetic reactions must take place for their  
213 construction and it therefore follows that their development should take longer than smaller  
214 organisms. And this intuition bears out across vast phylogenetic distances: from bacteria to  
215 sequoias, body size covaries with generation time [44]. Here, we found that in all temperatures,  
216 *C. inopinata* grows nearly twice as slowly as *C. elegans*, consistent with previous observations  
217 (Fig. 1; [32, 33]). Indeed, *C. inopinata* needs to be grown at 30°C to approach a rate of  
218 development comparable to that of *C. elegans* when grown at 20°C. Thus, the observation that  
219 this very large species also develops much more slowly than its close relatives is in line with  
220 decades of allometric studies. Further, as cell size is coordinated with cell division decisions in  
221 multiple organisms [45, 46], body size change could occur even in the absence of cell number  
222 change through the modification of cell cycle timing. This may explain the case of *C. inopinata*,  
223 as previous observations observed no change in cell number despite its large size and slow  
224 development [33].

225 However, there are reasons to suspect slow development may not underlie large body size in this  
226 case. It has been argued that the allometric trends observed in birds and mammals cannot be  
227 easily extended to poikilotherms because of difficulties in comparing physiological time due to  
228 rapid change in metabolic rates [16]. More notable is the common observation that  
229 developmental timing can be decoupled from body size in *C. elegans*. Most mutations in *C.*  
230 *elegans* that extend body length do not also slow the rate of growth: only 29% of the genes in the  
231 *C. elegans* genome known to control body length also promote slower development (Figure S5).  
232 Furthermore, experimental evolution and mutation accumulation studies in *C. elegans* and *C.*  
233 *briggsae* have not generally reported correlated changes in body size and developmental timing  
234 [23, 25, 26, 47]. Thus, it appears that body size and rate of growth need not be strongly coupled  
235 in *Caenorhabditis* and that the relationship between these traits observed in *C. inopinata* may not  
236 necessarily be causative.

237 Instead, the slow growth of *C. inopinata* may be better understood with respect to its natural  
238 ecological context. *C. inopinata* is associated with fresh figs and their pollinating wasps [35],  
239 whereas their close relatives tend to proliferate on rotting plant material [34]. And as *C.*  
240 *inopinata* animals disperse to new figs via pollinating wasps [35], their life cycle is necessarily  
241 closely tied to patterns of wasp development and emergence. Figs generally take weeks to  
242 develop [48], and although it is unclear how many generations of worms occur within a single  
243 fig, it is reasonable to suspect that the extreme divergence in developmental rate is connected to  
244 its novel natural context. This is consistent with correlations among *Ceratosolen* fig wasp and *C.*  
245 *inopinata* developmental stages that have been found in previous field studies [35]. Future  
246 longitudinal field studies of single fig trees at finer temporal resolution will be required to  
247 determine the relative paces of fig, fig wasp, and nematode development in nature and to test  
248 hypotheses regarding the ecological drivers of heterochrony.

### 249 *Reproduction*

250 The relationship between body size and reproduction varies both within and between taxa. In  
251 birds and mammals, larger species tend to have lower fecundities than smaller species [15].  
252 Conversely, body size appears to be positively correlated with fecundity in insects [49] and  
253 nematodes [50]. *C. inopinata* was generally found to have lower brood sizes than *C. elegans*  
254 across a range of temperatures (Fig. 4a), although continuous mating greatly improves fecundity  
255 in *C. inopinata* (Fig. 4b). The relatively low fecundity of *C. inopinata* is then incongruent with  
256 patterns of fecundity and body size that have been generally observed in nematodes. *C.*  
257 *inopinata*'s gonochoristic mode of development cannot explain its low brood size, as multiple  
258 male/female species of *Caenorhabditis* have been reported to have higher brood sizes [40, 41,  
259 51-54]. However, the sperm-limited fecundity of *C. inopinata* (Fig. 4b) is consistent with  
260 previous observations with the gonochoristic *C. remanei* [40, 41]. It is possible that the evolution  
261 of extreme body size in the case of *C. inopinata* reveals a trade-off with reproductive output,  
262 wherein resources usually allocated to progeny have instead been shifted to increase self-  
263 maintenance and growth. Yet most genes known to regulate body length in the *C. elegans*  
264 genome do not have a pleiotropic role in brood size (only 28% do; Figure S5). This is also  
265 consistent with experimental evolution studies in *Caenorhabditis* [23], wherein fecundity and  
266 body size do not necessarily trade-off. So again, the precise causal relationship here bears further  
267 study.

268 A particularly interesting avenue to pursue is based on the observation that wild bacteria  
269 associated with *Caenorhabditis* can have both positive or negative influences on fecundity and  
270 growth [55, 56] and that different species of *Caenorhabditis* are associated with different  
271 microbes in nature [55]. Thus the nutritional environment can have a profound effect on fitness.  
272 The natural microbial food of *C. inopinata* is currently unknown. As *C. inopinata* exhibits  
273 reduced gonads in laboratory culture [33], it may be experiencing nutritional deficiencies. The  
274 reduced fecundity of *C. inopinata* may then reflect a plastic response to an adverse environment  
275 as opposed to a trade-off with increased body size. The potential influence of natural microbial  
276 associates of *Ficus septica* figs on *C. inopinata* fitness affords an exciting opportunity for future  
277 research.

## 278 *Lifespan*

279 Lifespan is often positively correlated with body size, and from an allometric perspective is  
280 usually thought to be regulated by variation in developmental and metabolic rates [15, 17]. And  
281 although the age of maturity is sensitive to selection under a range of trait distributions in life  
282 history theory [1], from an evolutionary perspective it is thought that late-life traits are generally  
283 not subject to selection as its strength falls to zero once reproduction ends [3]. Despite its large  
284 size and slow development, *C. inopinata* was found to have only a marginally longer lifespan  
285 than *C. elegans* (Fig. 2). And, when differences in developmental timing and reproductive mode  
286 are taken into account, *C. inopinata* adult lifespan is not significantly different from that of *C.*  
287 *elegans* (Fig. 2b). The lack of lifespan change in this system is consistent with the view that  
288 lifespan is under weak selection, as *C. inopinata* has experienced dramatic change in many other  
289 traits under its novel ecological context [32, 33, 35]. Indeed, most lifespan-extending mutations  
290 identified in *C. elegans* have not been associated with pleiotropic effects on body size (Figure  
291 S5). Similarly, experimental evolution studies in *C. elegans* show no correlated responses in  
292 lifespan upon artificial selection on early fecundity [30] and body size [23]. Additionally, no  
293 relationships between lifespan and fecundity have been found in mutation-accumulation lines

294 [22] or among wild isolates [24]. These observations are inconsistent with the antagonistic  
295 pleiotropy explanation of aging, which posits that the greater fitness contribution of early life  
296 survival and reproduction leads to late life deterioration because of negative genetic correlations  
297 of these traits [57]. Rather, lifespan appears to be possibly largely uncoupled from fitness-related  
298 traits in this group, consistent with the unchanged longevity observed in *C. inopinata*. However,  
299 the nutritional caveats in this system noted in the above interpretation of observed patterns of  
300 fecundity also apply here. It is possible that *C. inopinata* will be longer-lived under different  
301 rearing conditions, and measurements of lifespan of *C. inopinata* raised on bacterial food  
302 originating from its natural context need to be performed.

### 303 *Temperature-dependent patterns of fitness-related traits in C. inopinata*

304 Notably, *C. inopinata* was more fit at higher than lower temperatures (Fig. 4a, Fig. 5).  
305 Temperature-dependent plasticity of fitness-related traits varies both within and between species  
306 in *Caenorhabditis*, and these patterns often coincide with ecological context. Within *C. briggsae*,  
307 there are definable clades that are genetically structured by latitude [58, 59], and these wild  
308 isolates reveal temperature-dependent patterns of fecundity that are consistent with their  
309 geographical origin [60]. Additionally, the tropical species *C. nigoni* [51, 61] and *C. tropicalis*  
310 [62] have higher fitness at warmer temperatures. As *C. inopinata* has only been found in the  
311 subtropical islands of Okinawa [32, 33], its temperature-dependent patterns of fitness are  
312 consistent with these previous observations. And further, the temperatures where *C. inopinata*  
313 has shown the highest fitness here are comparable to natural *Ficus septica* fig temperatures  
314 measured in nature [35]. As a close relative of *C. elegans*, this species is well positioned for  
315 uncovering the genomic bases of temperature adaptation.

## 316 **Conclusions**

317 Body size is a major driver of evolutionary change in multiple taxa, and changes in body size  
318 often co-occur with widespread change in life history traits. Here, we examined the life history  
319 traits of a large, ecologically-divergent close relative of *C. elegans*. We found that *C. inopinata*  
320 develops nearly twice as slowly as *C. elegans*, revealing a likely trade-off between growth and  
321 body size. Conversely, longevity does not evolve as part of correlated response to selection on  
322 body size in this system, consistent with previous studies and indicative of genetic decoupling of  
323 longevity from other life-history traits. Furthermore, patterns of fecundity in *C. inopinata* are  
324 also inconsistent with those expected of large nematodes. Hence change in body size alone  
325 cannot predict the evolution of whole suites of life history traits. Future studies that situate these  
326 systems within their natural ecological contexts will be needed to fully disentangle matters of  
327 cause and effect among the traits that constitute life history strategies. Taken together, these  
328 observations reveal that drastic change in ecological context and body size do not necessarily  
329 have an all-encompassing impact on life history syndromes.

## 330 **Methods**

### 331 *Strains and maintenance*

332 Animals were maintained on Nematode Growth Media (with 3.2% agar to discourage  
333 burrowing) supplemented with *Escherichia coli* strain OP50-1 for food. The *C. inopinata* wild



334 isolate strain NKZ2 [33] was utilized for all observations in this report. *C. elegans* N2 and the  
335 obligate outcrossing *C. elegans fog-2(q71)* JK574 [39] mutant strain were also used for most  
336 comparisons. Notably, *C. elegans* is hermaphroditic, while *C. inopinata* is male/female or  
337 gonochoristic. This makes interspecific comparisons problematic. Thus the *fog-2(q71)* mutation,  
338 which prevents spermatogenesis only in hermaphrodites but promotes no obvious somatic  
339 defects in either sex [39], was used to control for differences in reproductive mode in various  
340 comparisons of life history traits.

#### 341 *Developmental timing*

342 The timing of four developmental milestones (hatching, L4 stage, adult stage/young adulthood,  
343 and the onset of reproduction/reproductive adulthood) was measured at four temperatures: 15°C,  
344 20°C, 25°C, and 30°C. For synchronization, mid-stage embryos (blastula to 1.5 fold stage) were  
345 picked from plates cultured at 25°C to new plates and then shifted to the given rearing  
346 temperature. Plates were then monitored hourly (for hatching) and then daily (for L4, young  
347 adulthood, and reproductive adulthood) for the onset of developmental milestones. Male tail and  
348 female/hermaphrodite vulva morphologies were used to define L4 and young adult stages. The  
349 onset of reproduction was scored only among females and hermaphrodites by the presence of  
350 embryos in the uterus. Plates were assayed until the number of individuals at or older than a  
351 given milestone did not increase for two hours or days. Animals who failed to reach a given  
352 milestone were not used for subsequent analysis. For analysis, animals were plotted by their  
353 developmental status (“0” = yet to reach milestone; “1” = reached milestone) over time and  
354 logistic regression was used to estimate the median time to a given event via the “glm” function  
355 (using a binomial distribution) in the R statistical language. This models approach was used for  
356 hypothesis testing and for calculating 95% confidence intervals (see Additional File 2).

#### 357 *Lifespan*

358 Synchronized animals were generated by allowing gravid females/hermaphrodites (20 *C. elegans*  
359 hermaphrodites or *C. elegans fog-2(q71)* pseudo-females per plate; about 100 *C. inopinata*  
360 females per plate) to lay for 2-3 hours. After a few days, synchronized L4 virgin  
361 females/hermaphrodites were moved to new plates, with about 30 nematodes per plate. All  
362 animals were transferred every day for the first 4-5 days of adulthood as hermaphrodites  
363 reproduced. Subsequently, animals were scored every 1-3 days as either living or dead up until  
364 the point that all animals had died. All measurements were performed at 25°C. The number of  
365 days alive after egg-laying was taken as the measure of total lifespan. Adult lifespan was taken  
366 as the total lifespan minus two (*C. elegans*) or four (*C. inopinata*) days, as *C. inopinata* develops  
367 about twice as slowly as *C. elegans*. Statistical analyses were performed as in [36], with the  
368 *survival* package for the R statistical language being used to generate survivorship curves and the  
369 *coxme* package being used to generate Cox proportional hazard models and perform hypothesis  
370 tests (see Additional File 2).

#### 371 *Fecundity*

372 Daily offspring production was measured following overnight mating and under continuous  
373 exposure to males. For all observations, L4 *C. inopinata* NKZ2 and *C. elegans fog-2(q71)*  
374 animals raised at 25°C were isolated and raised for one (*C. elegans*) or two (*C. inopinata*) days

375 to adulthood (see above). For overnight mating, single adult females/pseudo-females were  
376 shifted to the given experimental rearing temperature and mated with six males overnight. Brood  
377 sizes were measured at 15°C, 20°C, 25°C, and 30°C. The next day males were removed. Every  
378 day, embryos and larvae were counted, and egg-laying females were moved to new plates. New  
379 progeny were scored until females stopped laying for at least one (*C. elegans*) or two (*C.*  
380 *inopinata*) consecutive days. Continuous mating conditions were similar, except that single  
381 females were always in the presence of six males. Males that crawled up the side of the plate or  
382 otherwise died before the female stopped laying embryos were replaced with young adult males.  
383 The continuous mating observations were performed at 25°C. The instantaneous rate of natural  
384 increase [1] was calculated with Python as in [63] using life tables for *C. elegans* and *C.*  
385 *inopinata* constructed from the viability, fecundity, and lifespan data developed here (see  
386 Additional File 3).

### 387 *Embryo to Adult Viability*

388 Nematode embryos were synchronized by allowing gravid females/hermaphrodites (20 *C.*  
389 *elegans* hermaphrodites or *C. elegans fog-2(q71)* pseudo-females per plate; about 100 *C.*  
390 *inopinata* females per plate) to lay for 2-3 hours. After the parents were removed, the number of  
391 embryos per plate were counted, and the plates were shifted to their respective rearing  
392 temperatures (15°C, 20°C, 25°C, or 30°C). L4 and adult worms were counted 4-5 days later.  
393 This fraction of mature worms/initial worm embryos was reported as the viability.

394

395

### 396 **Declarations**

397 *Ethics approval and consent to participate*

398 Not applicable.

399 *Consent for publication*

400 Not applicable.

401 *Availability of data and material*

402 All data and material not included as Additional Files are available by request.

403 *Competing interests*

404 The authors declare that they have no competing interests.

405 *Funding*

406 This work was supported by funding from the National Institutes of Health to GCW  
407 (5F32GM115209-03) and PCP (R01 GM-102511; R01 AG049396).



408 *Authors' contributions*

409 GCW and PCP designed the experiments; GCW and EJ performed the experiments; GCW  
410 analyzed the results; GCW and PCP wrote the paper.

411 *Acknowledgements*

412 Not applicable.

413 **Additional Files**

414 Additional File 1. Supplemental Figures and Table. Figure S1. Total lifespan models with 95%  
415 confidence intervals. Figure S2. Adult lifespan models with 95% confidence intervals. Figure S3.  
416 Patterns of failed crosses across mating conditions and temperatures. Figure S4. *C. inopinata* has  
417 lower brood sizes than *C. elegans (fog-2)* in continuous mating conditions after removing failed  
418 crosses. Figure S5. Intersections of relevant life history trait phenotypes in *C. elegans* protein-  
419 coding genes. Table S1. Estimates of median time of developmental events.

420 Additional File 2. models\_hypothesis\_tests.R. Software for generating models and statistics.

421 Additional File 3. estimate\_r.py. Software for estimating the rate of population increase.

422 Additional File 4. wormbase\_phenotype\_intersections.sh. Software for generating phenotype  
423 intersection UpSet plot data from a WormBase Simplemine tab-delimited file.

424 Additional File 5. hatch\_time\_data.tsv. Developmental timing data for hatching.

425 Additional File 6. postembryonic\_milestone\_time\_data.tsv. Developmental timing data for  
426 postembryonic milestones.

427 Additional File 7. lifespan\_data.tsv. Lifespan data.

428 Additional File 8. reproductive\_duration\_data.tsv. Reproductive duration data.

429 Additional File 9. fecundity\_lifetime\_access\_data.tsv. Fecundity with lifetime access to males  
430 data.

431 Additional File 10. fecundity\_overnight\_mating\_data.tsv. Fecundity with one overnight mating  
432 data.

433 Additional File 11. viability\_data.tsv. Viability data.

434 Additional File 12. life\_tables.tsv. Data used for estimating the rate of population increase.

435

436 **References**

437 1. Stearns SC: **The evolution of life histories**, vol. 249: Oxford University Press Oxford; 1992.

- 438 2. Roff DA: **Life history evolution**; 2002.
- 439 3. Hamilton WD: **The moulding of senescence by natural selection**. *Journal of theoretical biology*  
440 1966, **12**(1):12-45.
- 441 4. Emlen JM: **Age specificity and ecological theory**. *Ecology* 1970, **51**(4):588-601.
- 442 5. Charlesworth B: **Evolution in age-structured populations**: Cambridge University Press  
443 Cambridge; 1980.
- 444 6. Clutton-Brock TH, Guinness FE, Albon SD: **Red deer: behavior and ecology of two sexes**:  
445 University of Chicago press; 1982.
- 446 7. Reznick D: **Costs of reproduction: an evaluation of the empirical evidence**. *Oikos* 1985:257-  
447 267.
- 448 8. Luckinbill LS, Arking R, Clare MJ, Cirocco WC, Buck SA: **Selection for delayed senescence in**  
449 ***Drosophila melanogaster***. *Evolution* 1984, **38**(5):996-1003.
- 450 9. Reznick D: **The structure of guppy life histories: the tradeoff between growth and**  
451 **reproduction**. *Ecology* 1983, **64**(4):862-873.
- 452 10. Robinson B, Doyle R: **Trade-off between male reproduction (amplexus) and growth in the**  
453 **amphipod *Gammarus lawrencianus***. *The Biological Bulletin* 1985, **168**(3):482-488.
- 454 11. Ghalambor CK, Reznick DN, Walker JA: **Constraints on adaptive evolution: the functional**  
455 **trade-off between reproduction and fast-start swimming performance in the Trinidadian**  
456 **guppy (*Poecilia reticulata*)**. *Am Nat* 2004, **164**(1):38-50.
- 457 12. Fleming IA, Gross MR: **Latitudinal clines: a trade-off between egg number and size in**  
458 **Pacific salmon**. *Ecology* 1990, **71**(1):1-11.
- 459 13. Sadras VO: **Evolutionary aspects of the trade-off between seed size and number in crops**.  
460 *Field Crops Research* 2007, **100**(2):125-138.
- 461 14. McMahon TA, Bonner JT: **On size and life**: Scientific American Library; 1983.
- 462 15. Calder WA: **Size, function, and life history**: Courier Corporation; 1984.
- 463 16. Schmidt-Nielsen K: **Scaling: why is animal size so important?**: Cambridge University Press;  
464 1984.
- 465 17. Peters RH: **The ecological implications of body size**, vol. 2: Cambridge University Press; 1986.
- 466 18. Stanley SM: **An explanation for Cope's rule**. *Evolution* 1973, **27**(1):1-26.
- 467 19. Sibly RM, Calow P: **Physiological ecology of animals**: Blackwell Scientific Publications; 1986.
- 468 20. Blanckenhorn WU: **The evolution of body size: what keeps organisms small?** *The quarterly*  
469 *review of biology* 2000, **75**(4):385-407.
- 470 21. Corsi AK, Wightman B, Chalfie M: **A Transparent window into biology: A primer on**  
471 ***Caenorhabditis elegans***. *Genetics* 2015, **200**(2):387-407.
- 472 22. Keightley PD, Davies EK, Peters AD, Shaw RG: **Properties of ethylmethane sulfonate-**  
473 **induced mutations affecting life-history traits in *Caenorhabditis elegans* and inferences**  
474 **about bivariate distributions of mutation effects**. *Genetics* 2000, **156**(1):143-154.
- 475 23. Azevedo RB, Keightley PD, Laurén-Määttä C, Vassilieva LL, Lynch M, Leroi AM:  
476 **Spontaneous mutational variation for body size in *Caenorhabditis elegans***. *Genetics* 2002,  
477 **162**(2):755-765.
- 478 24. McCulloch D, Gems D: **Body size, insulin/IGF signaling and aging in the nematode**  
479 ***Caenorhabditis elegans***. *Experimental gerontology* 2003, **38**(1):129-136.
- 480 25. Estes S, Ajie BC, Lynch M, Phillips PC: **Spontaneous mutational correlations for life-history,**  
481 **morphological and behavioral characters in *Caenorhabditis elegans***. *Genetics* 2005,  
482 **170**(2):645-653.
- 483 26. Ostrow D, Phillips N, Avalos A, Blanton D, Boggs A, Keller T, Levy L, Rosenbloom J, Baer CF:  
484 **Mutational bias for body size in rhabditid nematodes**. *Genetics* 2007, **176**(3):1653-1661.
- 485 27. Kammenga JE, Doroszuk A, Riksen JA, Hazendonk E, Spiridon L, Petrescu A-J, Tijsterman M,  
486 Plasterk RH, Bakker J: **A *Caenorhabditis elegans* wild type defies the temperature-size rule**  
487 **owing to a single nucleotide polymorphism in *tra-3***. *PLoS Genet* 2007, **3**(3):e34.

- 488 28. Anderson JL, Albergotti L, Proulx S, Peden C, Huey RB, Phillips PC: **Thermal preference of**  
489 **Caenorhabditis elegans: a null model and empirical tests.** *Journal of Experimental Biology*  
490 2007, **210**(17):3107-3116.
- 491 29. Anderson JL, Albergotti L, Ellebracht B, Huey RB, Phillips PC: **Does thermoregulatory**  
492 **behavior maximize reproductive fitness of natural isolates of Caenorhabditis elegans?** *BMC*  
493 *Evol Biol* 2011, **11**(1):157.
- 494 30. Anderson JL, Reynolds RM, Morran LT, Tolman-Thompson J, Phillips PC: **Experimental**  
495 **evolution reveals antagonistic pleiotropy in reproductive timing but not life span in**  
496 **Caenorhabditis elegans.** *Journals of Gerontology Series A: Biomedical Sciences and Medical*  
497 *Sciences* 2011, **66**(12):1300-1308.
- 498 31. Frézal L, Félix M-A: **C. elegans outside the Petri dish.** *Elife* 2015, **4**:e05849.
- 499 32. Kanzaki N, Tsai IJ, Tanaka R, Hunt VL, Tsuyama K, Liu D, Maeda Y, Namai S, Kumagai R,  
500 Tracey A *et al*: **Biology and genome of a newly discovered sibling species of Caenorhabditis**  
501 **elegans.** *Nature communications* 2018.
- 502 33. Woodruff GC, Willis JH, Phillips PC: **Dramatic evolution of body length due to post-**  
503 **embryonic changes in cell size in a newly discovered close relative of C. elegans.** *Evolution*  
504 *Letters* 2018.
- 505 34. Kiontke KC, Félix M-A, Ailion M, Rockman MV, Braendle C, Pénigault J-B, Fitch DH: **A**  
506 **phylogeny and molecular barcodes for Caenorhabditis, with numerous new species from**  
507 **rotting fruits.** *BMC Evol Biol* 2011, **11**(1):339.
- 508 35. Woodruff GC, Phillips PC: **Field studies reveal a close relative of C. elegans thrives in the**  
509 **fresh figs of Ficus septica and disperses on its Ceratosolen pollinating wasps.** *BMC Ecol*  
510 2018.
- 511 36. Lucanic M, Plummer WT, Chen E, Harke J, Foulger AC, Onken B, Coleman-Hulbert AL, Dumas  
512 KJ, Guo S, Johnson E: **Impact of genetic background and experimental reproducibility on**  
513 **identifying chemical compounds with robust longevity effects.** *Nature Communications* 2017,  
514 **8**:14256.
- 515 37. Snell TW, King CE: **Lifespan and fecundity patterns in rotifers: the cost of reproduction.**  
516 *Evolution* 1977, **31**(4):882-890.
- 517 38. Cox RM, Calsbeek R: **SEVERE COSTS OF REPRODUCTION PERSIST IN ANOLIS**  
518 **LIZARDS DESPITE THE EVOLUTION OF A SINGLE-EGG CLUTCH.** *Evolution* 2010,  
519 **64**(5):1321-1330.
- 520 39. Schedl T, Kimble J: **fog-2, a germ-line-specific sex determination gene required for**  
521 **hermaphrodite spermatogenesis in Caenorhabditis elegans.** *Genetics* 1988, **119**(1):43-61.
- 522 40. Palopoli MF, Peden C, Woo C, Akiha K, Ary M, Cruze L, Anderson JL, Phillips PC: **Natural**  
523 **and experimental evolution of sexual conflict within Caenorhabditis nematodes.** *BMC Evol*  
524 *Biol* 2015, **15**(1):93.
- 525 41. Diaz SA, Haydon DT, Lindström J: **Sperm-limited fecundity and polyandry-induced**  
526 **mortality in female nematodes Caenorhabditis remanei.** *Biological Journal of the Linnean*  
527 *Society* 2010, **99**(2):362-369.
- 528 42. Thomas CG, Woodruff GC, Haag ES: **Causes and consequences of the evolution of**  
529 **reproductive mode in Caenorhabditis nematodes.** *Trends in Genetics* 2012, **28**(5):213-220.
- 530 43. Charlesworth B, Charlesworth D: **Elements of evolutionary genetics**, vol. 42: Roberts and  
531 Company Publishers Greenwood Village, CO; 2010.
- 532 44. Bonner JT: **Size and cycle**: Princeton University Pres; 1965.
- 533 45. Nurse P: **Genetic control of cell size at cell division in yeast.** *Nature* 1975, **256**(5518):547.
- 534 46. Stocker H, Hafen E: **Genetic control of cell size.** *Curr Opin Genet Dev* 2000, **10**(5):529-535.
- 535 47. Salomon MP, Ostrow D, Phillips N, Blanton D, Bour W, Keller TE, Levy L, Sylvestre T,  
536 Upadhyay A, Baer CF: **Comparing mutational and standing genetic variability for fitness**  
537 **and size in Caenorhabditis briggsae and C. elegans.** *Genetics* 2009, **183**(2):685-692.
- 538 48. Janzen DH: **How to be a fig.** *Annu Rev Ecol Syst* 1979, **10**(1):13-51.

- 539 49. Honěk A: **Intraspecific variation in body size and fecundity in insects: a general**  
540 **relationship.** *Oikos* 1993:483-492.
- 541 50. Morand S, Sorci G: **Determinants of life-history evolution in nematodes.** *Parasitol Today*  
542 1998, **14**(5):193-196.
- 543 51. Woodruff GC, Eke O, Baird SE, Félix M-A, Haag ES: **Insights into species divergence and the**  
544 **evolution of hermaphroditism from fertile interspecies hybrids of *Caenorhabditis***  
545 **nematodes.** *Genetics* 2010, **186**(3):997-1012.
- 546 52. Dey A, Jeon Y, Wang G-X, Cutter AD: **Global population genetic structure of *Caenorhabditis***  
547 **remanei reveals incipient speciation.** *Genetics* 2012, **191**(4):1257-1269.
- 548 53. Dey A, Chan CK, Thomas CG, Cutter AD: **Molecular hyperdiversity defines populations of**  
549 **the nematode *Caenorhabditis briggsae*.** *Proc Natl Acad Sci USA* 2013, **110**(27):11056-11060.
- 550 54. Bundus JD, Alaei R, Cutter AD: **Gametic selection, developmental trajectories, and extrinsic**  
551 **heterogeneity in Haldane's rule.** *Evolution* 2015, **69**(8):2005-2017.
- 552 55. Dirksen P, Marsh SA, Braker I, Heitland N, Wagner S, Nakad R, Mader S, Petersen C, Kowallik  
553 V, Rosenstiel P: **The native microbiome of the nematode *Caenorhabditis elegans*: gateway to**  
554 **a new host-microbiome model.** *BMC biology* 2016, **14**(1):1.
- 555 56. Samuel BS, Rowedder H, Braendle C, Félix M-A, Ruvkun G: ***Caenorhabditis elegans***  
556 **responses to bacteria from its natural habitats.** *Proc Natl Acad Sci USA* 2016, **113**(27):E3941-  
557 E3949.
- 558 57. Williams GC: **Pleiotropy, natural selection, and the evolution of senescence.** *Evolution* 1957,  
559 **11**:398-411.
- 560 58. Dolgin E, Felix M, Cutter A: **Hakuna Nematoda: genetic and phenotypic diversity in African**  
561 **isolates of *Caenorhabditis elegans* and *C. briggsae*.** *Heredity* 2008, **100**(3):304.
- 562 59. Thomas CG, Wang W, Jovelin R, Ghosh R, Lomasko T, Trinh Q, Kruglyak L, Stein LD, Cutter  
563 AD: **Full-genome evolutionary histories of selfing, splitting, and selection in *Caenorhabditis*.**  
564 *Genome res* 2015, **25**(5):667-678.
- 565 60. Prasad A, Croydon-Sugarman MJ, Murray RL, Cutter AD: **Temperature-dependent fecundity**  
566 **associates with latitude in *Caenorhabditis briggsae*.** *Evolution* 2011, **65**(1):52-63.
- 567 61. Kozłowska JL, Ahmad AR, Jahesh E, Cutter AD: **Genetic variation for postzygotic**  
568 **reproductive isolation between *Caenorhabditis briggsae* and *Caenorhabditis sp. 9*.** *Evolution*  
569 2012, **66**(4):1180-1195.
- 570 62. Pouillet N, Vielle A, Gimond C, Ferrari C, Braendle C: **Evolutionarily divergent thermal**  
571 **sensitivity of germline development and fertility in hermaphroditic *Caenorhabditis***  
572 **nematodes.** *Evolution & development* 2015, **17**(6):380-397.
- 573 63. Hill C: **Learning scientific programming with Python:** Cambridge University Press; 2016.  
574
